# Supplementary material for: Developing and Benchmarking One Health Genomic Surveillance Tools for Influenza A Virus in Wastewater
Source: Research Square preprint supplement (doi:10.21203/rs.3.rs-7666076/v1), 2025-10-13
Supplement: Supplementary file 1 [file a3195943a0566b64cea6edc8.xlsx]

## Sheet: Table S1
Table S1: Metadata for sequences included in the probe design
subtype	download source	Host/strain	Time range	download_date	Total virus	Total sequences	PA seqs #	NS seqs #	PB2 seqs #	PB1 seqs #	MP seqs #	HA seqs #	NP seq #	NA seqs #
H1N1	GISAID	all	5/15/23-5/15/24	2024-06-07	17273	139033	17371	17383	17385	17382	17385	17387	17373	17367
	GISAID	Avian + mammal	5/15/14-5/15/24	2024-06-16	2591	20835	2607	2606	2600	2603	2602	2608	2602	2607
	NCBI	JF9151XX.1 A/California/04/2009(H1N1)	Spike-in viruses		1	8	1	1	1	1	1	1	1	1
H3N1	GISAID	all	until 6/5/24	2024-06-07	209	1694	210	210	210	212	210	214	212	216
	NCBI	HA segment A/Texas/1/1977|CY113261|H3N2 NA and other segments A/Puerto_Rico/8/1934|CY148245|H1N1	Spike-in viruses		1	2	0	0	0	0	0	1	0	1
H5N1	GISAID	all	5/15/19 - 5/15/24	2024-06-07	11321	90752	11343	11339	11343	11344	11341	11343	11341	11358
	NCBI	GU0524XX.1 A/environment/Viet Nam/1203/2004(H5N1)	Potential spike-in viruses		1	8	1	1	1	1	1	1	1	1
H1N2	GISAID	all	until 6/5/24	2024-06-07	3448	27687	3462	3466	3460	3463	3457	3462	3458	3459
H2N2	GISAID	all	until 6/5/24	2024-07-07	297	2461	304	310	304	305	305	315	305	313
H3N2	GISAID	all	5/15/23-5/15/24	2024-06-07	12677	102032	12754	12757	12756	12755	12756	12758	12750	12746
	GISAID	Avian + mammal	5/15/14-5/15/24	2024-06-16	2174	17432	2179	2179	2182	2181	2176	2178	2179	2178
	NCBI	CY113740.1 A/Netherlands/823/1992(H3N2)	Spike-in viruses		1	8	1	1	1	1	1	1	1	1
H9N2	GISAID	all	until 6/5/24	2024-06-07	5453	44002	5487	5491	5500	5496	5489	5544	5495	5500
H7N9	GISAID	all	until 6/5/24	2024-06-07	2503	20052	2506	2506	2508	2506	2506	2508	2506	2506
H4N6	GISAID	all	until 6/16/24	2024-06-16	1749	14087	1758	1760	1763	1760	1759	1764	1758	1765
H5N6	GISAID	all	until 6/16/24	2024-06-16	2219	17905	2219	2220	2219	2219	2219	2304	2220	2285
H5N8	GISAID	all	until 6/16/24	2024-06-16	3378	27077	3378	3379	3379	3379	3378	3428	3378	3378
					Total sequences	525075	65581	65609	65612	65608	65586	65817	65580	65682
					After filtering Ns	451963	55362	58487	54982	54112	59089	56280	57262	56389
					After clustering at 90% identity	589	39	49	62	44	19	180	35	161

## Sheet: Table S2
Table S2: Different parametes for probes design
Probes design ID	cluster %	total sequences after clustering	mismatch	coverage	gaps	gaps redesign mismatch	baits number
Design 1	95	3082	5	100			29290
Design 2	95	3082	5	90			24128
Design 3	90	589	2	100			8110
Design 4	90	589	2	90			7216
Design 5	90	589	2	90	100	5	7668
Design 6	90	589	3	90			7076
Design 7	90	589	3	90	100	5	7518
Design 8	90	589	3	90	110	5	7499
Design 9	90	589	5	100			7586
Design 10	90	589	5	90			6689
Design 11	90	589	5	90	100	5	7151
Design 12	90	589	5	90	80	5	7199
Design 13	90	589	5	90	50	5	7295
Design 14	90	589	5	90	10	5	7516
Design 15 *	90	589	5	90	20	5	7448
Design 16	100	231134	5	100			69835
Design 17	100	231134	5	90			6030
Design 18	100	231134	5	90	100	5	31385
Design 19	100	231134	5	95			12343
* Final selected probe set

## Sheet: Table S3
Table S3. Tiled-amplicon primer sets designed in this study.
pool	subtype	tile	orientation	name	sequence	design tool	currently working
1	H1	0	F	H1_0F	TGCNGACACAYTATGTATA	primux	yes
1	H1	0	R	H1_0R	ACATGCHGCHGTTACACC	primux	yes
2	H1	1	F	H1_1F	AGCTCAGTNTCDTCVTTTG	primux	yes
2	H1	1	R	H1_1R	TCTBGCTGTAYNTTGATG	primux	yes
1	H1	2	F	H1_2F	TMAAGGGAAAGAAGTCCTCG	primux	yes, added 1 degeneracy
1	H1	2	R	H1_2R	GAGGCTDGTGTTTATAGC	primux	yes
2	H1	3	F	H1_3F	AABVTTYGAAGCAACTGG	primux	yes
2	H1	3	R	H1_3R	YCATNCCTGTCCANCCCC	primux	yes
1	H1	4	F	H1_4F	ATTGAGRCTGGCHACAGG	primux	yes
1	H1	4	R	H1_4R	TTCDGCATTGTADGTCCA	primux	yes
2	H1	5	F	H1_5F.2	TCACAGCAGTAGGTAAAG	primux	no, despite redesign
2	H1	5	R	H1_5R.2	TTTTGCTTCCTCTGAGTA	primux	no, despite redesign
1	H3	0	F	H3_0F	TGAAGRCTATCATTGCTTTGAGC	primer3plus	no, probably needed higher primer concentration
1	H3	0	R	H3_0R	YTCDACAAAVAGGTCCCA	primux	no, probably needed higher primer concentration
2	H3	1	F	H3_1F	CCTCAKTGTGAYGGCTTYCA	primer3plus	yes
2	H3	1	R	H3_1R	AGYTTGTTGGCTTCTTTTGGT	primer3plus	yes
1	H3	2	F	H3_2F	CTGCKTGCAAAAGGGGAYCT	primer3plus	yes
1	H3	2	R	H3_2R	TTTGAAGTAACCCCKAGG	primux	yes
2	H3	3	F	H3_3F	AGCATCTAYTGGACRATAGT	primux	yes
2	H3	3	R	H3_3R	TCCCAWCCATTTTCTATGA	primux	yes
1	H3	4	F	H3_4F	GCAACAGGRATGCGRAAT	primux	yes, added 1 degeneracy
1	H3	4	R	H3_4R.2	CTCCGCGTTGTAWGACCA	primux	yes
2	H3	5	F	H3_5F	TAGAYCTHTGGTCDTACAA	primux	yes
2	H3	5	R	H3_5R	GTTGCAYYTAATGTTGCC	primux	yes
1	H5	0	F	H5_0F.2	GTTCACTCTGTCAAAATGGA	primux	yes
1	H5	0	R	H5_0R.2	AGAGGTCATTAGCTGGGT	primux	yes
2	H5	1	F	H5_1F	NGGNTGGCTCCTNGGAAA	primux	yes
2	H5	1	R	H5_1R	TTDGVRTGATGAATCCCC	primux	yes
1	H5	2	F	H5_2F	CAGAAATGTGDTGTGGCT	primux	yes
1	H5	2	R	H5_2R	TTGACAYTTDGTGTYGCA	primux	yes
2	H5	3	F	H5_3F	GAATGGANTTCTTCTGGACA	primux	yes, added 1 degeneracy to accommodate 2004 vaccine strain
2	H5	3	R	H5_3R	ATACCADCCATCNACCAT	primux	yes
1	H5	4	F	H5_4F	TGCDACNGGGCTCAGAAA	primux	yes
1	H5	4	R	H5_4R	TCYTGACATTTGARTCATG	primux	yes
2	H5	5	F	H5_5F.2	TGGACMTATAATGCTGAAC	primux	yes, reduced degeneracy
2	H5	5	R	H5_5R.2	TGTAACGACCCATTGGAG	primux	yes, reduced degeneracy

## Sheet: Table S4
Table S4: Amplicon-based method PCR reaction parameters
Sequencing method	Reagents	Volume (uL)
Tiled-amplicon	2x platinum SuperFi mastermix	25
Tiled-amplicon	PCR water	4.5
Tiled-amplicon	SuperScript IV RT mix	0.5
Tiled-amplicon	Forward (2.5uM)	7.5
Tiled-amplicon	Reverse primer (2.5 uM)	7.5
Tiled-amplicon	Template RNA	5
Universal-amplicon	2x platinum SuperFi mastermix	25
Universal-amplicon	PCR water	17
Universal-amplicon	MBTuni-12 (1.25 uM)	0.625
Universal-amplicon	MBTuni-12.4 (1.25 uM)	0.625
Universal-amplicon	MBTuni-13 primer (2.5 uM)	1.25
Universal-amplicon	SuperScript IV RT mix	0.5
Universal-amplicon	Template RNA	5

## Sheet: Table S5
Table S5: Amplicon-based sequencing method PCR thermal cycling conditions
Sequencing method	Step	Temp	Time	Cycles
Tiled-amplicon	RT	45	10:00:00	1
	RT inactivation/denat	98	02:00:00	1
	denature	98	00:10:00	35
	anneal	50	00:10:00
	extend	72	00:30:00
	Final extension	72	05:00:00	1
	Hold	6	Inf
Universal-amplicon	RT	45	10:00:00	1
	RT inactivation/denat	98	02:00:00	1
	denature	98	00:10:00	35
	anneal	57	00:10:00
	extend	72	02:00:00
	Final extension	72	05:00:00	1
	Hold	6	Inf

## Sheet: Table S6
Table S6. Targeted and dPCR-quantified HA segment concentrations for each virus across direct mixtures S1–S3
Sample ID	Strains	Targeted conc. in library (gc/uL)	Actual conc. in library (gc/uL)	Virus v.s. WW RNA mass ratio	Sequencing method	Input volume (uL)	Final targeted gc in library	Actual gc in library
S1	H1N1	5.88235	5.352	4.41e-08	Tiled-amplicon Universal-amplicon	5	29.4118	26.76
S1	H3N1	5.88235	2.836			5	29.4118	14.18
S1	H3N2	5.88235	1.488			5	29.4118	7.44
S1	H5N1	5.88235	0			5	29.4118	0
S2	H1N1	58.8235	39.724	4.41e-07		5	294.118	198.62
S2	H3N1	58.8235	32.132			5	294.118	160.66
S2	H3N2	58.8235	23.868			5	294.118	119.34
S2	H5N1	58.8235	0			5	294.118	0
S3	H1N1	588.235	381.8	2.42e-06		5	2941.18	1909
S3	H3N1	58.8235	33.352			5	294.118	166.76
S3	H3N2	588.235	196.52			5	2941.18	982.6
S3	H5N1	58.8235	0			5	294.118	0
S1	H1N1	5.88235	5.352	4.41e-08	Probe-IAV Probe-Twist Unenriched	15	88.2353	80.28
S1	H3N1	5.88235	2.836			15	88.2353	42.54
S1	H3N2	5.88235	1.488			15	88.2353	22.32
S1	H5N1	5.88235	0			15	88.2353	0
S2	H1N1	58.8235	39.724	4.41e-07		15	882.353	595.86
S2	H3N1	58.8235	32.132			15	882.353	481.98
S2	H3N2	58.8235	23.868			15	882.353	358.02
S2	H5N1	58.8235	0			15	882.353	0
S3	H1N1	588.235	381.8	2.42e-06		15	8823.53	5727
S3	H3N1	58.8235	33.352			15	882.353	500.28
S3	H3N2	588.235	196.52			15	8823.53	2947.8
S3	H5N1	58.8235	0			15	882.353	0

## Sheet: Table S7
Table S7: Averaged sequencing depth across triplicates for each sample
Sequencing Method	Sample ID	Mean read depth	STD of read depth
Tiled-amplicon	IP_0h_1	2772392	0
Twist_comprehensive	IP_0h_1	23794626	0
Twist_IAV	IP_0h_1	85949506	0
Universal-amplicon	IP_0h_1	571691	0
Tiled-amplicon	IP_3h	7.497e+06	2.78688e+06
Twist_comprehensive	IP_3h	5888682	3.70095e+06
Twist_IAV	IP_3h	25428086	1.36864e+07
Universal-amplicon	IP_3h	648409	217894
Tiled-amplicon	PMG_0h_1	12259566	0
Twist_comprehensive	PMG_0h_1	2356772	0
Twist_IAV	PMG_0h_1	9999436	0
Universal-amplicon	PMG_0h_1	1234066	0
Tiled-amplicon	S1	8.3596e+06	1.48787e+06
Twist_comprehensive	S1	2801750	74399.9
Twist_IAV	S1	20269372	2.02137e+06
Universal-amplicon	S1	483060	153644
Tiled-amplicon	S2	7.40785e+06	1.14917e+06
Twist_comprehensive	S2	3.60218e+06	350211
Twist_IAV	S2	2.78446e+07	6.51951e+06
Universal-amplicon	S2	578797	83569.7
Tiled-amplicon	S3	7938792	2.81227e+06
Twist_comprehensive	S3	5.06807e+06	358604
Twist_IAV	S3	2.80486e+07	4.3622e+06
unenriched	S3	14388408	0
Universal-amplicon	S3	546266	129741

## Sheet: Table S8
Table S8. Averaged log10 RPKM and coverage breadth of all segments across all sequencing methods and all virus strains.
Segment	Sequencing methods	Strain	Sample ID	Log10 RPKM	Coverage breadth (%)
PB2	Probe-IAV	H1N1	S1	2.5 ± 0.3	64.1 ± 11.3
PB2	Probe-IAV	H3N1	S1	2.4 ± 0.4	97.5 ± 1.6
PB2	Probe-IAV	H3N2	S1	2.5 ± 0.3	77.9 ± 7.9
PB2	Probe-Twist	H1N1	S1	1.9 ± 0.4	64.9 ± 16.9
PB2	Probe-Twist	H3N1	S1	2.0 ± 0.4	93.3 ± 4.8
PB2	Probe-Twist	H3N2	S1	1.9 ± 0.4	75.7 ± 10.7
PB2	Universal-amplicon	H1N1	S1	1.9 ± 0.3	16.3 ± 5.1
PB2	Universal-amplicon	H3N1	S1	2.0 ± 0.6	16.2 ± 0.5
PB2	Universal-amplicon	H3N2	S1	1.7 ± 0.3	45.2 ± 38.4
PB1	Probe-IAV	H1N1	S1	2.7 ± 0.3	89.5 ± 0.6
PB1	Probe-IAV	H3N1	S1	2.4 ± 0.5	95.5 ± 2.5
PB1	Probe-IAV	H3N2	S1	2.5 ± 0.5	93.5 ± 5.2
PB1	Probe-Twist	H1N1	S1	2.3 ± 0.3	89.4 ± 5.8
PB1	Probe-Twist	H3N1	S1	2.0 ± 0.5	91.6 ± 4.2
PB1	Probe-Twist	H3N2	S1	2.2 ± 0.4	94.1 ± 1.5
PB1	Universal-amplicon	H1N1	S1	4.3 ± 0.9	18.0 ± 13.1
PB1	Universal-amplicon	H3N1	S1	1.8 ± 0.0	99.3 ± 2.9
PB1	Universal-amplicon	H3N2	S1	2.2 ± 0.5	23.6 ± 0.7
PA	Probe-IAV	H1N1	S1	2.5 ± 0.4	75.9 ± 3.3
PA	Probe-IAV	H3N1	S1	2.5 ± 0.4	94.2 ± 3.5
PA	Probe-IAV	H3N2	S1	2.5 ± 0.4	85.9 ± 11.8
PA	Probe-Twist	H1N1	S1	2.0 ± 0.4	72.4 ± 5.2
PA	Probe-Twist	H3N1	S1	2.1 ± 0.5	91.5 ± 1.4
PA	Probe-Twist	H3N2	S1	1.8 ± 0.5	67.0 ± 9.9
PA	Universal-amplicon	H1N1	S1	0.0 ± 0.0	0.0 ± 0.0
PA	Universal-amplicon	H3N1	S1	3.5 ± 1.7	24.8 ± 7.2
PA	Universal-amplicon	H3N2	S1	1.8 ± 0.4	74.7 ± 34.5
HA	Tiled-amplicon	H1N1	S1	2.2 ± 0.8	87.4 ± 0.0
HA	Tiled-amplicon	H3N1	S1	3.6 ± 1.0	88.4 ± 5.5
HA	Tiled-amplicon	H3N2	S1	3.2 ± 0.9	87.7 ± 4.6
HA	Tiled-amplicon	H5N1	S1	2.7 ± 0.7	89.2 ± 13.0
HA	Probe-IAV	H1N1	S1	2.3 ± 0.4	87.8 ± 11.0
HA	Probe-IAV	H3N1	S1	3.0 ± 0.3	97.6 ± 2.4
HA	Probe-IAV	H3N2	S1	2.9 ± 0.5	93.4 ± 6.2
HA	Probe-IAV	H5N1	S1	2.2 ± 0.4	77.9 ± 13.4
HA	Probe-Twist	H1N1	S1	2.1 ± 0.3	58.6 ± 4.1
HA	Probe-Twist	H3N1	S1	2.2 ± 0.4	92.1 ± 1.2
HA	Probe-Twist	H3N2	S1	2.1 ± 0.5	85.5 ± 10.4
HA	Probe-Twist	H5N1	S1	1.5 ± 0.4	40.2 ± 16.7
HA	Universal-amplicon	H1N1	S1	0.0 ± 0.0	0.0 ± 0.0
HA	Universal-amplicon	H3N1	S1	0.0 ± 0.0	0.0 ± 0.0
HA	Universal-amplicon	H3N2	S1	1.8 ± 0.4	98.7 ± 1.8
HA	Universal-amplicon	H5N1	S1	0.0 ± 0.0	0.0 ± 0.0
NP	Probe-IAV	H1N1	S1	2.6 ± 0.3	89.2 ± 11.7
NP	Probe-IAV	H3N1	S1	3.0 ± 0.4	96.2 ± 1.5
NP	Probe-IAV	H3N2	S1	2.7 ± 0.4	91.9 ± 2.6
NP	Probe-Twist	H1N1	S1	2.2 ± 0.4	72.6 ± 15.6
NP	Probe-Twist	H3N1	S1	2.3 ± 0.4	91.6 ± 6.2
NP	Probe-Twist	H3N2	S1	1.9 ± 0.5	78.7 ± 2.7
NP	Universal-amplicon	H1N1	S1	0.0 ± 0.0	0.0 ± 0.0
NP	Universal-amplicon	H3N1	S1	0.0 ± 0.0	0.0 ± 0.0
NP	Universal-amplicon	H3N2	S1	1.6 ± 0.3	61.0 ± 38.1
NA	Probe-IAV	H1N1	S1	2.3 ± 0.3	69.0 ± 5.7
NA	Probe-IAV	H3N1	S1	3.2 ± 0.3	98.3 ± 1.0
NA	Probe-IAV	H3N2	S1	2.7 ± 0.3	86.4 ± 7.5
NA	Probe-IAV	H5N1	S1	2.2 ± 0.4	57.9 ± 1.1
NA	Probe-Twist	H1N1	S1	1.8 ± 0.5	45.7 ± 14.9
NA	Probe-Twist	H3N1	S1	2.0 ± 0.4	90.4 ± 1.7
NA	Probe-Twist	H3N2	S1	2.0 ± 0.4	70.1 ± 9.4
NA	Probe-Twist	H5N1	S1	1.6 ± 0.2	25.3 ± 8.1
NA	Universal-amplicon	H1N1	S1	1.8 ± 0.0	99.4 ± 3.7
NA	Universal-amplicon	H3N1	S1	0.0 ± 0.0	0.0 ± 0.0
NA	Universal-amplicon	H3N2	S1	2.2 ± 0.0	87.5 ± 3.3
NA	Universal-amplicon	H5N1	S1	0.0 ± 0.0	0.0 ± 0.0
MP	Probe-IAV	H1N1	S1	2.9 ± 0.4	93.8 ± 3.9
MP	Probe-IAV	H3N1	S1	3.6 ± 0.5	99.4 ± 0.2
MP	Probe-IAV	H3N2	S1	2.8 ± 0.4	90.7 ± 5.9
MP	Probe-Twist	H1N1	S1	2.5 ± 0.5	99.9 ± 0.0
MP	Probe-Twist	H3N1	S1	3.5 ± 0.4	99.8 ± 0.2
MP	Probe-Twist	H3N2	S1	2.3 ± 0.4	80.3 ± 10.8
MP	Universal-amplicon	H1N1	S1	1.7 ± 0.0	99.8 ± 4.5
MP	Universal-amplicon	H3N1	S1	5.1 ± 0.0	99.9 ± 2.3
MP	Universal-amplicon	H3N2	S1	2.6 ± 0.3	100.0 ± 0.0
NS	Probe-IAV	H1N1	S1	2.4 ± 0.3	52.9 ± 19.6
NS	Probe-IAV	H3N1	S1	2.9 ± 0.5	92.2 ± 5.3
NS	Probe-IAV	H3N2	S1	2.1 ± 0.4	66.7 ± 21.1
NS	Probe-Twist	H1N1	S1	2.0 ± 0.3	54.7 ± 25.7
NS	Probe-Twist	H3N1	S1	2.3 ± 0.5	91.3 ± 6.0
NS	Probe-Twist	H3N2	S1	1.9 ± 0.4	60.5 ± 22.5
NS	Universal-amplicon	H1N1	S1	1.4 ± 0.0	99.4 ± 4.9
NS	Universal-amplicon	H3N1	S1	5.0 ± 0.0	99.8 ± 4.9
NS	Universal-amplicon	H3N2	S1	2.5 ± 0.1	99.8 ± 4.9
PB2	Probe-IAV	H1N1	S2	3.1 ± 0.3	96.2 ± 1.1
PB2	Probe-IAV	H3N1	S2	3.1 ± 0.3	99.6 ± 0.3
PB2	Probe-IAV	H3N2	S2	3.0 ± 0.3	94.6 ± 2.3
PB2	Probe-Twist	H1N1	S2	2.9 ± 0.2	99.8 ± 0.2
PB2	Probe-Twist	H3N1	S2	3.0 ± 0.3	100.0 ± 0.0
PB2	Probe-Twist	H3N2	S2	2.7 ± 0.2	99.7 ± 0.3
PB2	Universal-amplicon	H1N1	S2	3.0 ± 0.1	19.1 ± 0.6
PB2	Universal-amplicon	H3N1	S2	3.3 ± 1.4	18.9 ± 3.3
PB2	Universal-amplicon	H3N2	S2	4.1 ± 1.0	59.5 ± 40.5
PB1	Probe-IAV	H1N1	S2	3.3 ± 0.3	97.3 ± 2.0
PB1	Probe-IAV	H3N1	S2	3.3 ± 0.4	98.3 ± 1.8
PB1	Probe-IAV	H3N2	S2	3.3 ± 0.3	98.7 ± 0.9
PB1	Probe-Twist	H1N1	S2	3.1 ± 0.2	99.7 ± 0.3
PB1	Probe-Twist	H3N1	S2	3.0 ± 0.3	100.0 ± 0.0
PB1	Probe-Twist	H3N2	S2	3.1 ± 0.4	99.6 ± 0.4
PB1	Universal-amplicon	H1N1	S2	2.2 ± 0.4	15.1 ± 0.2
PB1	Universal-amplicon	H3N1	S2	1.8 ± 0.7	42.7 ± 40.0
PB1	Universal-amplicon	H3N2	S2	1.8 ± 0.1	7.7 ± 0.6
PA	Probe-IAV	H1N1	S2	3.1 ± 0.4	89.1 ± 8.8
PA	Probe-IAV	H3N1	S2	3.3 ± 0.3	98.6 ± 1.1
PA	Probe-IAV	H3N2	S2	3.1 ± 0.3	93.8 ± 5.0
PA	Probe-Twist	H1N1	S2	2.9 ± 0.3	99.6 ± 0.2
PA	Probe-Twist	H3N1	S2	2.9 ± 0.3	99.9 ± 0.0
PA	Probe-Twist	H3N2	S2	2.8 ± 0.3	99.7 ± 0.2
PA	Universal-amplicon	H1N1	S2	4.3 ± 0.2	23.3 ± 0.7
PA	Universal-amplicon	H3N1	S2	3.3 ± 1.5	99.5 ± 1.6
PA	Universal-amplicon	H3N2	S2	3.1 ± 1.1	62.9 ± 32.8
HA	Tiled-amplicon	H1N1	S2	3.3 ± 0.7	87.4 ± 0.0
HA	Tiled-amplicon	H3N1	S2	4.0 ± 1.5	97.9 ± 0.9
HA	Tiled-amplicon	H3N2	S2	3.7 ± 1.3	95.5 ± 3.3
HA	Tiled-amplicon	H5N1	S2	3.7 ± 0.6	98.7 ± 0.4
HA	Probe-IAV	H1N1	S2	2.9 ± 0.3	94.0 ± 3.4
HA	Probe-IAV	H3N1	S2	3.6 ± 0.5	99.0 ± 1.0
HA	Probe-IAV	H3N2	S2	3.3 ± 0.3	98.9 ± 0.8
HA	Probe-IAV	H5N1	S2	2.8 ± 0.4	94.0 ± 3.4
HA	Probe-Twist	H1N1	S2	2.7 ± 0.3	99.1 ± 0.6
HA	Probe-Twist	H3N1	S2	3.2 ± 0.3	99.6 ± 0.3
HA	Probe-Twist	H3N2	S2	2.9 ± 0.3	99.2 ± 1.1
HA	Probe-Twist	H5N1	S2	2.0 ± 0.4	98.2 ± 1.9
HA	Universal-amplicon	H1N1	S2	1.7 ± 0.0	12.0 ± 2.4
HA	Universal-amplicon	H3N1	S2	0.0 ± 0.0	0.0 ± 0.0
HA	Universal-amplicon	H3N2	S2	2.7 ± 1.0	99.9 ± 1.7
HA	Universal-amplicon	H5N1	S2	0.0 ± 0.0	0.0 ± 0.0
NP	Probe-IAV	H1N1	S2	3.4 ± 0.3	95.4 ± 1.9
NP	Probe-IAV	H3N1	S2	3.6 ± 0.4	99.6 ± 0.1
NP	Probe-IAV	H3N2	S2	3.3 ± 0.3	94.2 ± 1.7
NP	Probe-Twist	H1N1	S2	3.2 ± 0.3	99.1 ± 1.0
NP	Probe-Twist	H3N1	S2	3.1 ± 0.4	99.2 ± 0.7
NP	Probe-Twist	H3N2	S2	3.0 ± 0.4	99.2 ± 1.2
NP	Universal-amplicon	H1N1	S2	0.0 ± 0.0	0.0 ± 0.0
NP	Universal-amplicon	H3N1	S2	2.1 ± 0.6	19.1 ± 0.1
NP	Universal-amplicon	H3N2	S2	1.7 ± 0.0	67.7 ± 31.5
NA	Probe-IAV	H1N1	S2	2.8 ± 0.3	90.2 ± 3.7
NA	Probe-IAV	H3N1	S2	3.8 ± 0.4	99.7 ± 0.3
NA	Probe-IAV	H3N2	S2	3.2 ± 0.3	94.7 ± 3.3
NA	Probe-IAV	H5N1	S2	2.8 ± 0.3	86.6 ± 8.6
NA	Probe-Twist	H1N1	S2	2.4 ± 0.4	97.8 ± 1.2
NA	Probe-Twist	H3N1	S2	2.8 ± 0.4	99.7 ± 0.2
NA	Probe-Twist	H3N2	S2	2.7 ± 0.3	98.5 ± 1.6
NA	Probe-Twist	H5N1	S2	2.0 ± 0.4	93.7 ± 7.3
NA	Universal-amplicon	H1N1	S2	5.0 ± 0.0	99.9 ± 3.8
NA	Universal-amplicon	H3N1	S2	4.7 ± 0.6	100.0 ± 1.9
NA	Universal-amplicon	H3N2	S2	1.7 ± 0.1	94.9 ± 3.6
NA	Universal-amplicon	H5N1	S2	0.0 ± 0.0	0.0 ± 0.0
MP	Probe-IAV	H1N1	S2	3.5 ± 0.3	99.0 ± 0.7
MP	Probe-IAV	H3N1	S2	4.3 ± 0.4	100.0 ± 0.0
MP	Probe-IAV	H3N2	S2	3.3 ± 0.5	96.3 ± 3.5
MP	Probe-Twist	H1N1	S2	3.4 ± 0.2	99.8 ± 0.2
MP	Probe-Twist	H3N1	S2	4.5 ± 0.4	100.0 ± 0.0
MP	Probe-Twist	H3N2	S2	3.2 ± 0.4	99.1 ± 0.4
MP	Universal-amplicon	H1N1	S2	1.7 ± 0.0	99.1 ± 4.5
MP	Universal-amplicon	H3N1	S2	5.3 ± 0.1	100.0 ± 0.0
MP	Universal-amplicon	H3N2	S2	3.3 ± 1.0	100.0 ± 0.0
NS	Probe-IAV	H1N1	S2	3.0 ± 0.6	91.4 ± 5.7
NS	Probe-IAV	H3N1	S2	3.4 ± 0.7	98.9 ± 0.4
NS	Probe-IAV	H3N2	S2	3.0 ± 0.5	96.7 ± 2.3
NS	Probe-Twist	H1N1	S2	2.8 ± 0.3	95.3 ± 0.8
NS	Probe-Twist	H3N1	S2	3.3 ± 0.4	100.0 ± 0.0
NS	Probe-Twist	H3N2	S2	2.7 ± 0.3	99.0 ± 1.0
NS	Universal-amplicon	H1N1	S2	2.1 ± 0.0	99.8 ± 4.9
NS	Universal-amplicon	H3N1	S2	4.1 ± 1.6	94.1 ± 8.4
NS	Universal-amplicon	H3N2	S2	1.7 ± 0.0	98.9 ± 4.8
PB2	Probe-IAV	H1N1	S3	3.8 ± 0.3	99.7 ± 0.2
PB2	Probe-IAV	H3N1	S3	2.9 ± 0.3	99.5 ± 0.3
PB2	Probe-IAV	H3N2	S3	3.8 ± 0.3	99.2 ± 1.0
PB2	Probe-Twist	H1N1	S3	3.7 ± 0.2	100.0 ± 0.0
PB2	Probe-Twist	H3N1	S3	2.9 ± 0.2	100.0 ± 0.0
PB2	Probe-Twist	H3N2	S3	3.6 ± 0.2	100.0 ± 0.0
PB2	Universal-amplicon	H1N1	S3	3.8 ± 1.0	23.3 ± 2.4
PB2	Universal-amplicon	H3N1	S3	2.9 ± 0.7	20.6 ± 1.5
PB2	Universal-amplicon	H3N2	S3	3.9 ± 0.6	73.3 ± 37.8
PB2	Unenriched	H1N1	S3	-0.2 ± 0.1	14.2 ± 0.0
PB2	Unenriched	H3N1	S3	0.0 ± 0.2	20.6 ± 0.0
PB2	Unenriched	H3N2	S3	0.0 ± 0.0	0.0 ± 0.0
PB1	Probe-IAV	H1N1	S3	4.0 ± 0.3	99.9 ± 0.1
PB1	Probe-IAV	H3N1	S3	3.0 ± 0.4	99.7 ± 0.1
PB1	Probe-IAV	H3N2	S3	4.0 ± 0.3	99.9 ± 0.1
PB1	Probe-Twist	H1N1	S3	4.0 ± 0.2	100.0 ± 0.0
PB1	Probe-Twist	H3N1	S3	2.9 ± 0.4	99.9 ± 0.0
PB1	Probe-Twist	H3N2	S3	3.9 ± 0.3	100.0 ± 0.0
PB1	Universal-amplicon	H1N1	S3	4.0 ± 0.6	56.7 ± 43.3
PB1	Universal-amplicon	H3N1	S3	4.2 ± 0.8	53.4 ± 46.6
PB1	Universal-amplicon	H3N2	S3	2.8 ± 1.2	99.7 ± 0.4
PB1	Unenriched	H1N1	S3	0.0 ± 0.1	14.6 ± 0.0
PB1	Unenriched	H3N1	S3	0.0 ± 0.0	0.0 ± 0.0
PB1	Unenriched	H3N2	S3	0.1 ± 0.2	42.8 ± 0.0
PA	Probe-IAV	H1N1	S3	3.8 ± 0.3	99.8 ± 0.2
PA	Probe-IAV	H3N1	S3	3.0 ± 0.3	99.3 ± 0.4
PA	Probe-IAV	H3N2	S3	3.9 ± 0.3	99.9 ± 0.0
PA	Probe-Twist	H1N1	S3	3.8 ± 0.3	99.9 ± 0.0
PA	Probe-Twist	H3N1	S3	2.8 ± 0.3	99.8 ± 0.1
PA	Probe-Twist	H3N2	S3	3.7 ± 0.3	100.0 ± 0.0
PA	Universal-amplicon	H1N1	S3	2.9 ± 1.2	99.6 ± 1.6
PA	Universal-amplicon	H3N1	S3	2.6 ± 0.0	99.9 ± 3.0
PA	Universal-amplicon	H3N2	S3	4.6 ± 0.2	100.0 ± 0.0
PA	Unenriched	H1N1	S3	-0.1 ± 0.1	30.3 ± 0.0
PA	Unenriched	H3N1	S3	-0.2 ± 0.0	6.9 ± 0.0
PA	Unenriched	H3N2	S3	0.0 ± 0.0	0.0 ± 0.0
HA	Tiled-amplicon	H1N1	S3	4.2 ± 0.7	87.4 ± 0.0
HA	Tiled-amplicon	H3N1	S3	3.8 ± 1.4	98.6 ± 0.5
HA	Tiled-amplicon	H3N2	S3	4.4 ± 1.3	99.2 ± 0.1
HA	Tiled-amplicon	H5N1	S3	3.5 ± 0.6	98.9 ± 0.0
HA	Probe-IAV	H1N1	S3	3.7 ± 0.4	99.7 ± 0.2
HA	Probe-IAV	H3N1	S3	3.4 ± 0.3	98.9 ± 0.9
HA	Probe-IAV	H3N2	S3	4.0 ± 0.2	99.9 ± 0.1
HA	Probe-IAV	H5N1	S3	2.6 ± 0.3	95.5 ± 2.9
HA	Probe-Twist	H1N1	S3	3.6 ± 0.3	100.0 ± 0.0
HA	Probe-Twist	H3N1	S3	3.1 ± 0.3	99.5 ± 0.3
HA	Probe-Twist	H3N2	S3	3.8 ± 0.3	100.0 ± 0.0
HA	Probe-Twist	H5N1	S3	1.8 ± 0.4	98.9 ± 0.2
HA	Universal-amplicon	H1N1	S3	2.4 ± 0.2	19.7 ± 1.3
HA	Universal-amplicon	H3N1	S3	4.0 ± 0.0	99.9 ± 3.4
HA	Universal-amplicon	H3N2	S3	4.3 ± 0.2	100.0 ± 0.0
HA	Universal-amplicon	H5N1	S3	0.0 ± 0.0	0.0 ± 0.0
HA	Unenriched	H1N1	S3	0.0 ± 0.0	0.0 ± 0.0
HA	Unenriched	H3N1	S3	-0.2 ± 0.1	18.4 ± 0.0
HA	Unenriched	H3N2	S3	-0.2 ± 0.0	21.6 ± 0.0
HA	Unenriched	H5N1	S3	0.0 ± 0.0	0.0 ± 0.0
NP	Probe-IAV	H1N1	S3	4.0 ± 0.2	99.9 ± 0.0
NP	Probe-IAV	H3N1	S3	3.3 ± 0.4	98.8 ± 0.8
NP	Probe-IAV	H3N2	S3	4.0 ± 0.4	99.8 ± 0.3
NP	Probe-Twist	H1N1	S3	4.0 ± 0.3	100.0 ± 0.0
NP	Probe-Twist	H3N1	S3	3.0 ± 0.4	100.0 ± 0.1
NP	Probe-Twist	H3N2	S3	3.8 ± 0.3	100.0 ± 0.0
NP	Universal-amplicon	H1N1	S3	4.4 ± 0.2	87.1 ± 12.9
NP	Universal-amplicon	H3N1	S3	1.4 ± 0.0	19.0 ± 0.7
NP	Universal-amplicon	H3N2	S3	4.4 ± 0.0	100.0 ± 1.8
NP	Unenriched	H1N1	S3	-0.5 ± 0.0	20.1 ± 0.0
NP	Unenriched	H3N1	S3	0.0 ± 0.0	0.0 ± 0.0
NP	Unenriched	H3N2	S3	0.0 ± 0.0	0.0 ± 0.0
NA	Probe-IAV	H1N1	S3	3.5 ± 0.4	99.6 ± 0.6
NA	Probe-IAV	H3N1	S3	3.4 ± 0.4	99.7 ± 0.3
NA	Probe-IAV	H3N2	S3	3.9 ± 0.4	100.0 ± 0.1
NA	Probe-IAV	H5N1	S3	2.5 ± 0.3	85.9 ± 7.9
NA	Probe-Twist	H1N1	S3	3.4 ± 0.3	100.0 ± 0.0
NA	Probe-Twist	H3N1	S3	2.7 ± 0.4	100.0 ± 0.0
NA	Probe-Twist	H3N2	S3	3.7 ± 0.3	99.9 ± 0.1
NA	Probe-Twist	H5N1	S3	2.0 ± 0.4	96.4 ± 1.2
NA	Universal-amplicon	H1N1	S3	4.2 ± 0.3	100.0 ± 1.9
NA	Universal-amplicon	H3N1	S3	0.0 ± 0.0	0.0 ± 0.0
NA	Universal-amplicon	H3N2	S3	3.9 ± 1.2	62.2 ± 37.8
NA	Universal-amplicon	H5N1	S3	0.0 ± 0.0	0.0 ± 0.0
NA	Unenriched	H1N1	S3	0.0 ± 0.0	0.0 ± 0.0
NA	Unenriched	H3N1	S3	0.1 ± 0.2	24.1 ± 0.0
NA	Unenriched	H3N2	S3	0.0 ± 0.0	0.0 ± 0.0
NA	Unenriched	H5N1	S3	0.0 ± 0.0	0.0 ± 0.0
MP	Probe-IAV	H1N1	S3	4.2 ± 0.3	100.0 ± 0.0
MP	Probe-IAV	H3N1	S3	4.0 ± 0.4	100.0 ± 0.0
MP	Probe-IAV	H3N2	S3	4.1 ± 0.4	100.0 ± 0.0
MP	Probe-Twist	H1N1	S3	4.3 ± 0.2	100.0 ± 0.0
MP	Probe-Twist	H3N1	S3	4.4 ± 0.4	100.0 ± 0.0
MP	Probe-Twist	H3N2	S3	4.0 ± 0.3	100.0 ± 0.0
MP	Universal-amplicon	H1N1	S3	4.8 ± 0.3	100.0 ± 0.0
MP	Universal-amplicon	H3N1	S3	4.5 ± 0.3	100.0 ± 0.0
MP	Universal-amplicon	H3N2	S3	5.4 ± 0.1	100.0 ± 0.0
MP	Unenriched	H1N1	S3	-0.1 ± 0.1	40.4 ± 0.0
MP	Unenriched	H3N1	S3	-0.2 ± 0.0	18.1 ± 0.0
MP	Unenriched	H3N2	S3	-0.2 ± 0.0	12.6 ± 0.0
NS	Probe-IAV	H1N1	S3	3.6 ± 0.4	98.0 ± 1.7
NS	Probe-IAV	H3N1	S3	3.2 ± 0.5	99.6 ± 0.5
NS	Probe-IAV	H3N2	S3	3.5 ± 0.5	99.4 ± 0.8
NS	Probe-Twist	H1N1	S3	3.7 ± 0.3	100.0 ± 0.0
NS	Probe-Twist	H3N1	S3	3.2 ± 0.3	100.0 ± 0.0
NS	Probe-Twist	H3N2	S3	3.5 ± 0.3	100.0 ± 0.1
NS	Universal-amplicon	H1N1	S3	3.9 ± 1.6	100.0 ± 0.0
NS	Universal-amplicon	H3N1	S3	4.3 ± 0.3	100.0 ± 0.0
NS	Universal-amplicon	H3N2	S3	0.0 ± 0.0	0.0 ± 0.0
NS	Unenriched	H1N1	S3	0.0 ± 0.0	0.0 ± 0.0
NS	Unenriched	H3N1	S3	0.0 ± 0.0	0.0 ± 0.0
NS	Unenriched	H3N2	S3	-0.2 ± 0.0	21.1 ± 0.0

## Sheet: Table S9
Table S9: The slope and R^2 value of quantitative correlation between log10 RPKM and log10 dPCR concentration of HA
Sequencing methods	Strain	Slope	R^2
Tiled-amplicon	H1N1	1.0734	0.987496
Tiled-amplicon	H3N1	0.505472	0.758161
Tiled-amplicon	H3N2	0.686159	0.977097
Probe-IAV	H1N1	0.722226	0.975457
Probe-IAV	H3N1	0.456248	0.768539
Probe-IAV	H3N2	0.495877	0.887488
Probe-Twist	H1N1	0.926288	0.990136
Probe-Twist	H3N1	0.896996	0.961184
Probe-Twist	H3N2	0.799935	0.980199
Universal-amplicon	H1N1	0.93236	0.818055
Universal-amplicon	H3N2	1.25688	0.765644

## Sheet: Table S10
Table S10. Statistical test for IP v.s. PMG coverage breadth, dPCR conc., and RPKM from each strain under each sequencing method
Sequencing method	Strain	Coverage p value	dPCR p value	RPKM p value
Tiled-amplicon	H1N1	0.619257	0.003*	0.002*
Probe-IAV	H1N1	0.106583	0.003*	0.2
Probe-Twist	H1N1	0.059346	0.003*	0.000036*
Universal-amplicon	H1N1	0.567335	0.003*	0.333866
Tiled-amplicon	H3N1	0.184039	0.023*	0.006*
Probe-IAV	H3N1	0.2	0.023*	0.2
Probe-Twist	H3N1	0.375825	0.023*	0.005*
Universal-amplicon	H3N1	0.504985	0.023*	0.504985
Tiled-amplicon	H3N2	1	0.002*	0.001*
Probe-IAV	H3N2	1	0.002*	0.2
Probe-Twist	H3N2	NaN	0.002*	0.000004*
Universal-amplicon	H3N2	NaN	0.002*	0.263991
* p < 0.05

[truncated: 2 more sheets: Table S11, Table S12]
